# Supplementary material for: Effects of Co-Solvent Nature and Acid Concentration in the Size and Morphology of Wrinkled Mesoporous Silica Nanoparticles for Drug Delivery Applications
Source: MDPI journal article supplement (doi:10.3390/molecules26144186), 2021-07-09
Supplement: s1 [file s1]

# Effects of co-solvent nature and acid concentration in the size and morphology of wrinkled mesoporous silica nanoparticles for drug delivery applications

Jessica Andrea Flood-Garibay<sup>1</sup> and Miguel A. Méndez-Rojas<sup>1,\*</sup>

<sup>1</sup> Department of Chemical & Biological Sciences and Laboratory of Nanotechnology and Molecular Biomedicine Research, School of Sciences, Universidad de las Américas Puebla, San Andrés Cholula, 72810 Puebla, México; jessicaa.floodgy@udlap.mx

\* Correspondence: miguela.mendez@udlap.mx

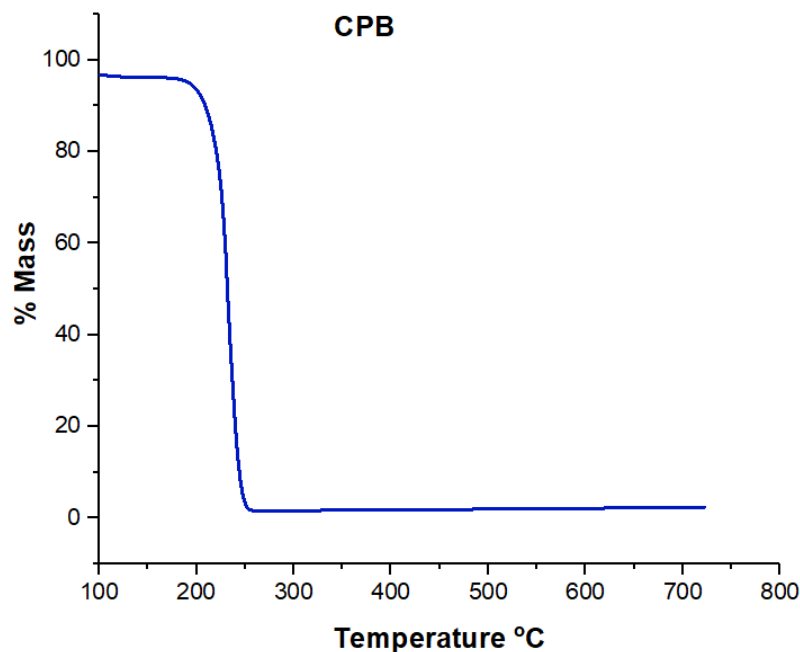

**Figure S1.** Thermal analysis by TGA in inert conditions of Cetylpyridinium bromide (CPB, 97%).

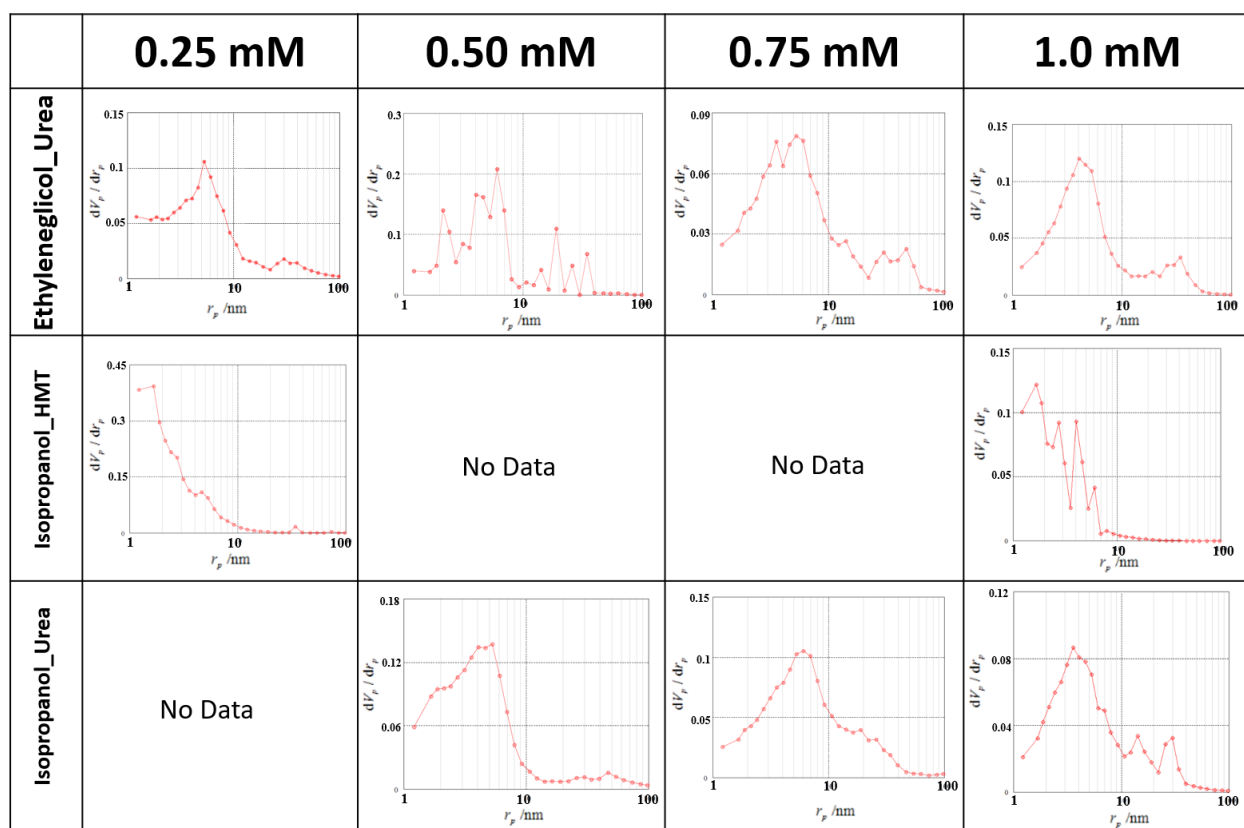

**Figure S2.** Pore size distribution graphs for different synthesis performed using varying co-solvents and bases in the presence of distinct concentrations of HCl.

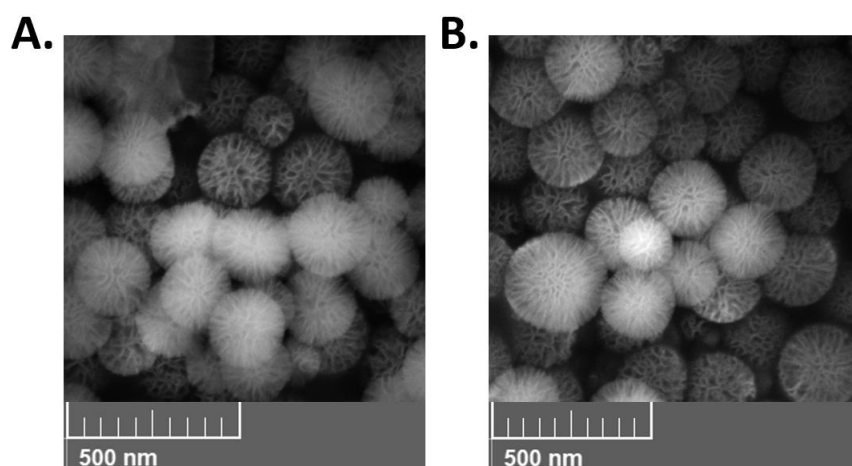

**Figure S3.** SEM micrographs of WMS **A.** before and **B.** after thermal treatment at 800 °C
